# Supplementary material for: Trends in the atmospheric water vapour estimatedfrom GPS data for different elevation cutoff angles
Source: Copernicus journal article supplement (doi:10.5194/amt-2018-279), 2018-09-10
Supplement: Supplementary file [file amt-2018-279-AC2-supplement.pdf]

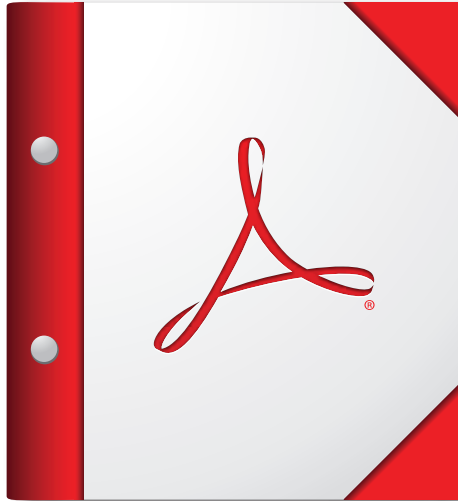

**For the best experience, open this PDF portfolio in  
Acrobat X or Adobe Reader X, or later.**

**Get Adobe Reader Now!**
